# Supplementary material for: Equity of geographical access to public health facilities in Nepal
Source: PubMed Central journal article supplement — BMJ Glob Health. 2021 Oct 27;6(10):e006786. doi: 10.1136/bmjgh-2021-006786 (PMC8552161; doi:10.1136/bmjgh-2021-006786), 2021-10-27
Supplement: bmjgh-2021-006786supp001.pdf [file bmjgh-2021-006786supp001.pdf]

### Supplemental Appendix

This file provides supplementary figures, tables and methods for “The geographical accessibility of public health facilities and the assessment of its equality in Nepal” by Wen-Rui Cao, Prabin Shakya, Biraj M Karmacharya, Dong Roman Xu, Yuan-Tao Hao, and Ying-Si Lai.

**Table of Contents**

|                                                                                                                                                            |    |
|------------------------------------------------------------------------------------------------------------------------------------------------------------|----|
| Figure S1. Study area                                                                                                                                      | 3  |
| Density distribution of public health facilities                                                                                                           | 4  |
| Figure S2. The density distribution map of different public health facility level                                                                          | 4  |
| Table S1. Data sources                                                                                                                                     | 5  |
| Table S2. Road speed settings according to different standards                                                                                             | 6  |
| Table S3. The population-weighted average travel time to the nearest public health facility based on the three road speed settings                         | 6  |
| The formulas of Gini coefficient and Theil <i>L</i> index                                                                                                  | 7  |
| Table S4. The population-weighted average travel time to the nearest public health facility under different travel modes                                   | 8  |
| Table S5. Summaries of the cumulative population percentage with different geographical accessibility (%)                                                  | 8  |
| Figure S3. The population coverage of travel time to the nearest public health facility                                                                    | 8  |
| Figure S4. Reductions of travel time and Gini coefficient for new facility placement in Nepal with walking mode                                            | 9  |
| Figure S5. Geographical accessibility according to travel times to the nearest health facilities (either public or non-public) with different travel modes | 10 |
| Figure S6. Geographical accessibility according to travel times to the nearest non-public health facilities with different travel modes                    | 10 |
| References                                                                                                                                                 | 11 |

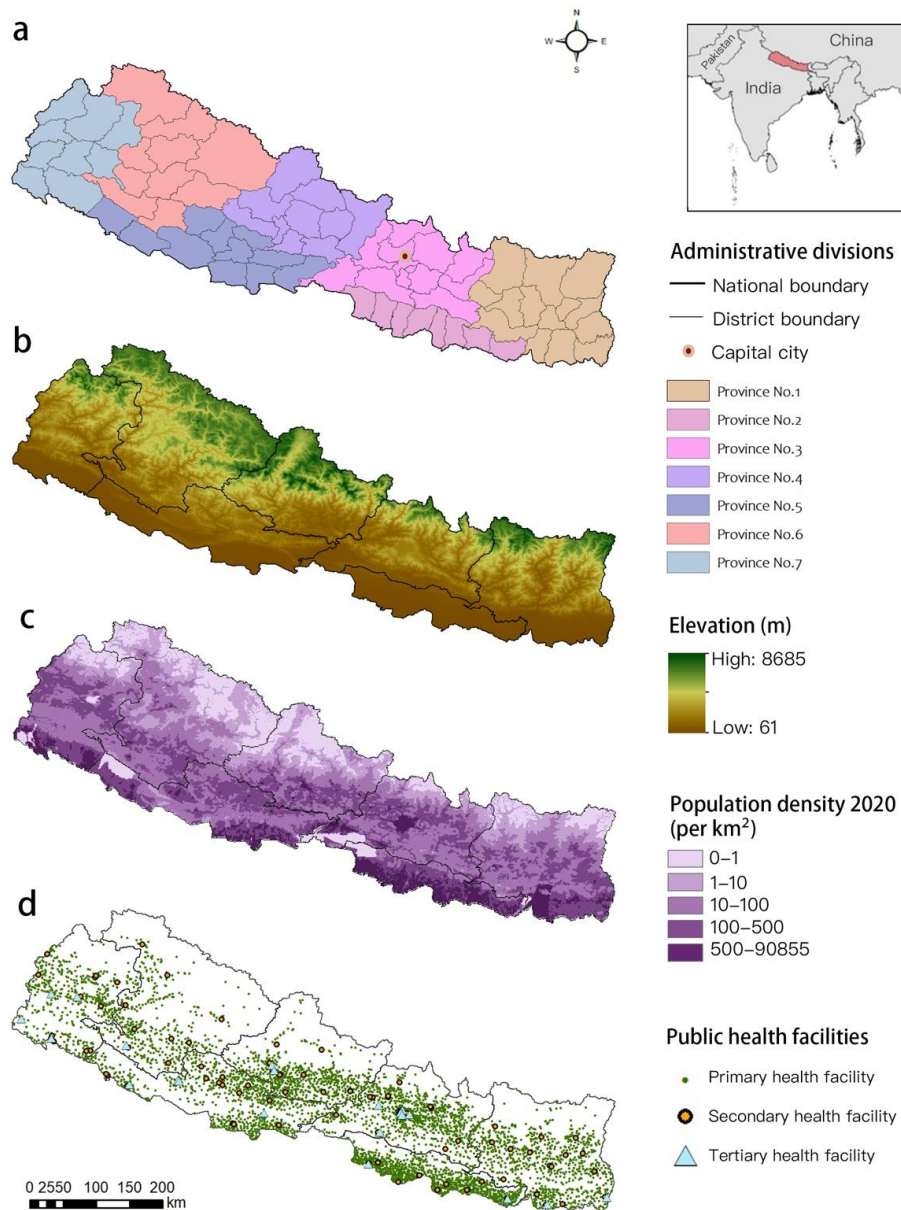

**Figure S1. Study area. (a) Provinces and districts in Nepal; (b) Elevation map; (c) population density map; (d) spatial locations of primary, secondary, and tertiary public health facilities.**

### Density distribution of public health facilities

A regular  $1 \times 1$  km<sup>2</sup> grid was overlaid to Nepal, resulted in 195,574 pixels. Kernel density estimation (KDE) based on Silverman's Rule-of-thumb bandwidth estimation was adopted to assess the density of different levels of health facilities across the country.[1] Particularly, the bandwidth ( $r$ ) was calculated according to the formula  $r = 0.9 * \min\left(SD, \sqrt{\frac{1}{\ln(2)} * D_m}\right) * n^{-0.2}$ , where  $n$  is the total number of health facilities,  $SD$  is the standard distance from the geometric mean center, and  $D_m$  is the median of distances from facilities to their mean center. The density of health facilities at pixel  $s$  is expressed as  $\lambda(s) = \sum_{i=1}^u \frac{1}{\pi r^2} k\left(\frac{d_{is}}{r}\right)$ , where  $u$  is the number of health facilities inside bandwidth,  $d_{is}$  is the distance from pixel  $s$  to health facility  $i$  inside the bandwidth, and  $k\left(\frac{d_{is}}{r}\right)$  is the weight function of health facility  $i$  corresponding to  $s$ , modeled by a quartic kernel function with  $\frac{d_{is}}{r}$ . Above analyses were performed with ArcGIS 10.5.

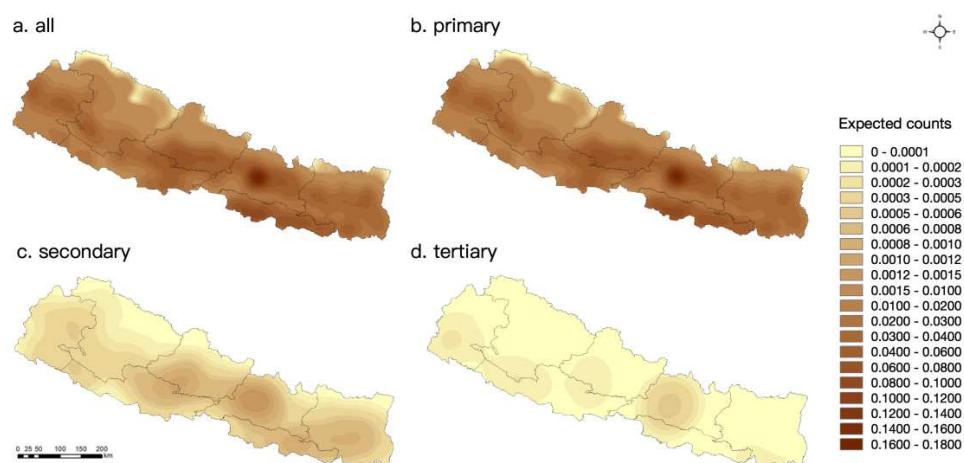

Figure S2. The density distribution map of different public health facility level.

**Table S1. Data sources**

| <b>Data</b>                    | <b>Temporal reference</b>       | <b>Spatial resolution</b> | <b>Source</b>                                                                                                                                               |
|--------------------------------|---------------------------------|---------------------------|-------------------------------------------------------------------------------------------------------------------------------------------------------------|
| Population count (UN adjusted) | 2020                            | 1 km                      | <a href="https://www.worldpop.org/geodata/listing?id=75">https://www.worldpop.org/geodata/listing?id=75</a>                                                 |
| Friction surfaces              | 2020                            | 1 km                      | <a href="https://malariaatlas.org/research-project/accessibility-to-healthcare/">https://malariaatlas.org/research-project/accessibility-to-healthcare/</a> |
| Nepal health facilities        | Up to 22 <sup>th</sup> May 2021 | location specific         | - <a href="https://nhfr.mohp.gov.np/home">https://nhfr.mohp.gov.np/home</a>                                                                                 |

**Table S2. Road speed settings according to different standards**

| Road type    | Speed used by friction surfaces 2020 (km/h) | Nepal road standard speed (km/h) | Google Maps road speed (km/h) |
|--------------|---------------------------------------------|----------------------------------|-------------------------------|
| Trunk        | 60                                          | 50                               | 50                            |
| Primary      | 30                                          | 30                               | 30                            |
| Secondary    | 40                                          | 40                               | 45                            |
| Tertiary     | 30                                          | 30                               | 30                            |
| Unclassified | 30                                          | 30                               | 30                            |
| Road         | 20                                          | 20                               | 20                            |
| Residential  | 30                                          | 30                               | 30                            |
| Service      | 30                                          | 30                               | 30                            |
| Track        | 30                                          | 30                               | 30                            |
| Pedestrian   | 20                                          | 20                               | 20                            |
| Other        | 20                                          | 20                               | 20                            |

**Table S3. The population-weighted average travel time to the nearest public health facility based on the three road speed settings**

| Facility level | Speed used by friction surfaces 2020 under motorized mode (minutes) | Nepal road standard speed (minutes) | Google Maps road speed (minutes) |
|----------------|---------------------------------------------------------------------|-------------------------------------|----------------------------------|
| Any            | 17.87                                                               | 17.90                               | 17.87                            |
| Primary        | 17.91                                                               | 17.95                               | 17.92                            |
| Secondary      | 39.88                                                               | 40.54                               | 39.74                            |
| Tertiary       | 69.23                                                               | 72.07                               | 70.27                            |

### The formulas of Gini coefficient and Theil L index

Based on  $x_s$ , the Gini coefficient ( $G$ ) was calculated as following:[2]

$$G = \sum_{k=1}^{N-1} (F_k \Phi_{k+1} - F_{k+1} \Phi_k)$$

Here  $N$  is the total number of pixels across Nepal,  $k$  is the rank in terms of the impedance function value from the lowest to the highest.  $F_k = \sum_{s=1}^k (p_s/P)$  and  $\Phi_k = \sum_{s=1}^k (h_s/H)$ , represented the cumulative proportion of population and that of impedance function value up to  $k$ , respectively. Here  $P = \sum_{s=1}^N p_s$ ,  $h_s = p_s x_s$ ,  $H = \sum_{s=1}^N h_s$ , where  $p_s$  is the population density at pixel  $s$ .

The Theil  $L$  index was calculated as  $L = \sum_k (p_k/P) \log(X/x_k)$ , where  $X = H/P$ . [3] The decomposition expression of Theil  $L$  can be written as:  $L = L_b + L_w$ , where the between-province component  $L_b = \sum_j (P_j/P) \log(X/X_j)$  and the within-province component  $L_w = \sum_j (P_j/P) L_j$  for  $j^{\text{th}}$  province.

**Table S4. The population-weighted average travel time to the nearest public health facility under different travel modes**

| Facility level | Motorized mode (minutes) | Walking mode (minutes) |
|----------------|--------------------------|------------------------|
| Any            | 17.87                    | 33.97                  |
| Primary        | 17.91                    | 34.23                  |
| Secondary      | 39.88                    | 180.26                 |
| Tertiary       | 69.23                    | 404.37                 |

**Table S5. Summaries of the cumulative population percentages with different geographical accessibility (%)**

| Travel mode    | Facility level | Travel time (minutes) |       |       |       |
|----------------|----------------|-----------------------|-------|-------|-------|
|                |                | <5                    | <15   | <30   | <60   |
| Motorized mode | Any            | 78.47                 | 92.54 | 96.05 | 98.27 |
|                | Primary        | 78.15                 | 92.49 | 96.04 | 98.27 |
|                | Secondary      | 18.29                 | 35.65 | 63.93 | 89.39 |
|                | Tertiary       | 15.54                 | 25.00 | 37.63 | 60.61 |
| Walking mode   | Any            | 16.34                 | 55.54 | 80.24 | 94.63 |
|                | Primary        | 15.81                 | 54.98 | 79.81 | 94.53 |
|                | Secondary      | 1.35                  | 7.85  | 14.49 | 25.05 |
|                | Tertiary       | 0.75                  | 5.21  | 11.13 | 18.67 |

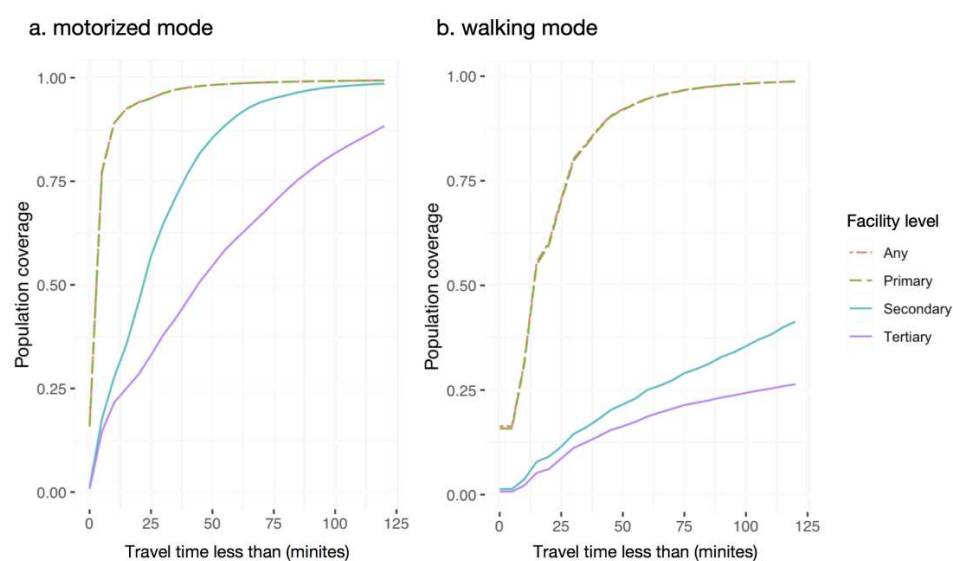**Figure S3. The population coverage of travel time to the nearest public health facility. (a) With motorized mode; (b) with walking mode.**



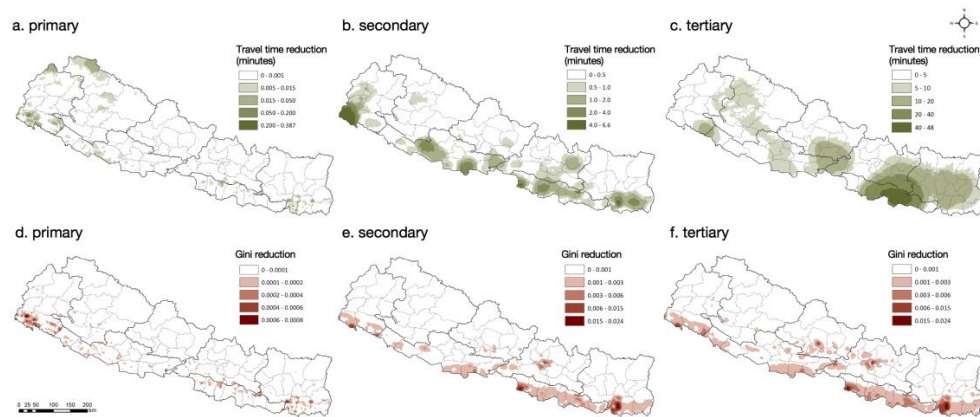

**Figure S4. Reductions of travel time and Gini coefficient for new facility placement in Nepal with walking mode.**

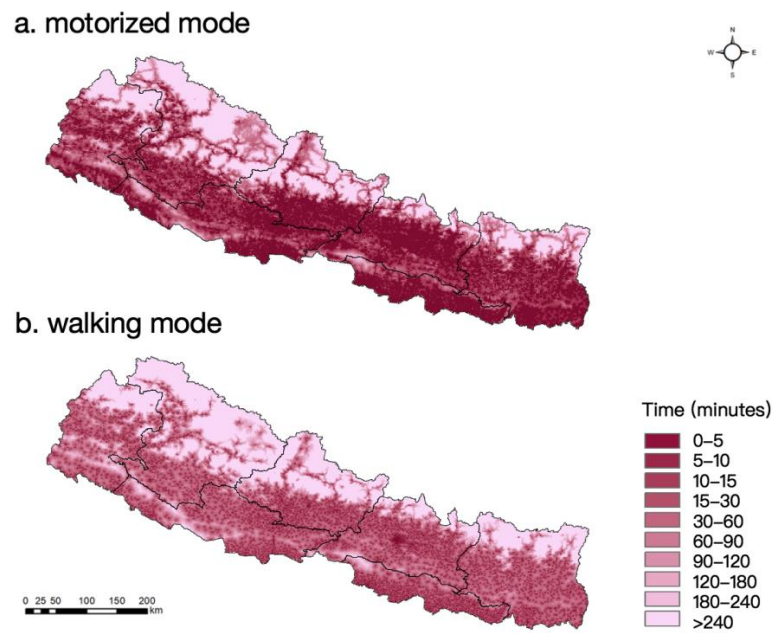

**Figure S5. Geographical accessibility according to travel times to the nearest health facilities (either public or non-public) with different travel modes. (a) The motorized mode; (b) the walking mode.**

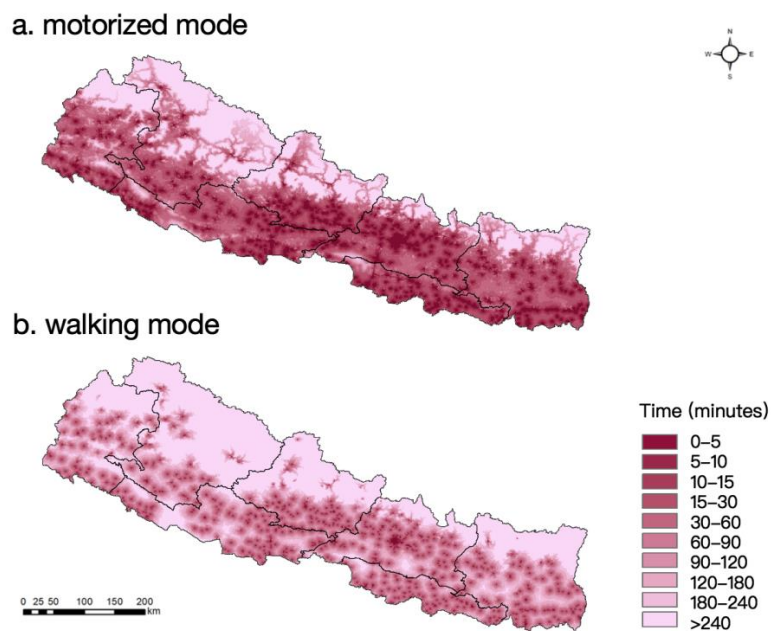

**Figure S6. Geographical accessibility according to travel times to the nearest non-public health facilities with different travel modes. (a) The motorized mode; (b) the walking mode.**

**References**

- 1 Silverman BW. Density Estimation for Statistics and Data Analysis. London: Chapman and Hall; 1986.
- 2 Anand S. Inequality and Poverty in Malaysia: Measurement and Decomposition. New York: Oxford University Press; 1983: 311–313.
- 3 Theil H. Economics and Information Theory. Amsterdam: North-Holland; 1967:125–127.
